# Supplementary material
Source: PubMed Central journal article supplement (PMC3497811)
Supplement: 1201800109_pnas.1201800109_SI.pdf [file 1201800109_pnas.1201800109_SI.pdf]

# Supporting Information

Jagannathan et al. 10.1073/pnas.1201800109

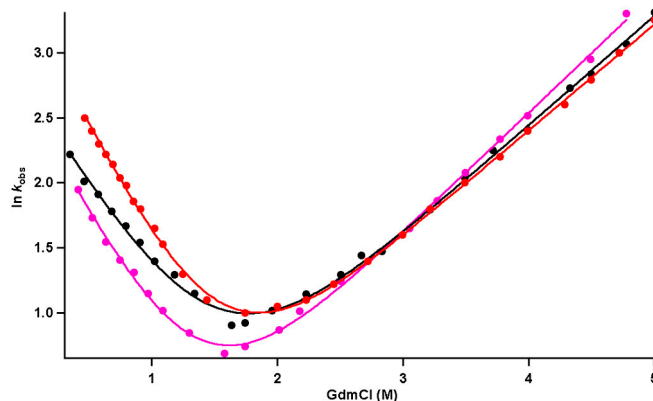

**Fig. S1.** Ensemble kinetic chevron plots for cysteine-free, wild-type src SH3 (pink), A7C/N59C src SH3 (black), and R19C/N59C src SH3 (red). The stopped-flow experiments were performed at 25 °C under the same buffer conditions as those used in the optical tweezers (10 mM Tris pH 7.0, 250 mM NaCl).

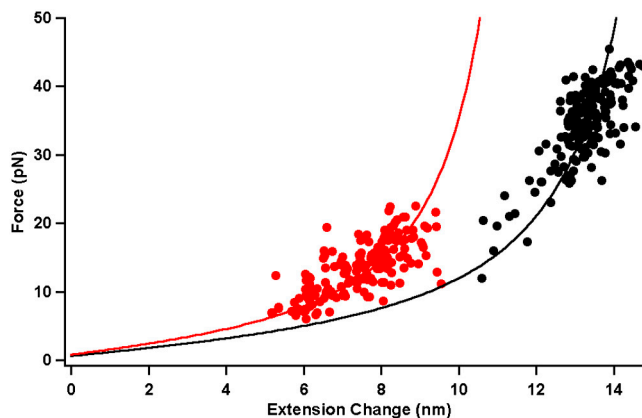

**Fig. S2.** The measured extension changes in force ramp experiments for A7C/N59C (black) and R19C/N59C (red) src SH3. The extension changes were fit to a worm-like chain model (solid lines) using a persistence length of 0.65 nm and a contour length of 0.36 nm/residue. The distances between the cysteine residues in the folded state was estimated from the structure of src SH3 (Protein Data Bank ID code 1SRL).

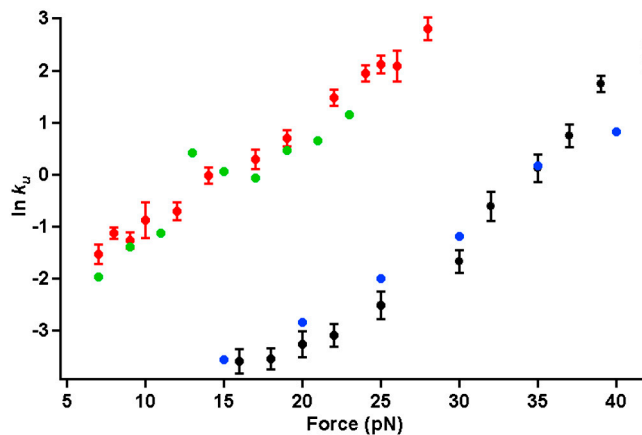

**Fig. S3.** Comparison of the force-dependent unfolding rates measured in our force-jump experiments (A7C/N59C, black; R19C/N59C, red) to the rates extracted from the unfolding force histograms (A7C/N59C, blue; R19C/N59C, green) using the method described by Dudko et al. (1).

1 Dudko OK, Hummer G, Szabo A (2008) Theory, analysis, and interpretation of single-molecule force spectroscopy experiments. *Proc Natl Acad Sci USA* 105:15755–15760.



**Table S2. Average unfolding forces ( $F_u$ ) and distances to the transition states ( $X_u^\ddagger$ ) of src SH3 variants under shearing and unzipping forces**

| src SH3 construct | $F_u$ , pN     | $X_u^\ddagger$ , nm                                         |
|-------------------|----------------|-------------------------------------------------------------|
| A7C/N59C          | $35.0 \pm 0.5$ | $0.45 \pm 0.05$ (low force)<br>$1.40 \pm 0.15$ (high force) |
| A7C/N59C/I34A     | $35.0 \pm 0.3$ | $0.45 \pm 0.06$ (low force)<br>$1.30 \pm 0.20$ (high force) |
| A7C/N59C/S47A     | $34.0 \pm 0.8$ | $0.25 \pm 0.05$ (low force)<br>$1.25 \pm 0.20$ (high force) |
| R19C/N59C         | $14.0 \pm 0.3$ | $0.70 \pm 0.05$                                             |
| R19C/N59C/I34A    | $17.5 \pm 0.5$ | $0.72 \pm 0.05$                                             |
| R19C/N59C/S47A    | $11.0 \pm 0.3$ | $0.65 \pm 0.10$                                             |
